# Supplementary material
Source: Springer Nature journal article supplement (https://www.springermedizin.de/resource/supplementary/12884_2012_489_MOESM1_ESM.pdf/9457922)
Supplement: MOESM1 [file 9457922]

Visit mothers at hospitals for first post natal check and get consent

Agree

Disagree

Enrolled in the study

Do not participate in the study

### **Hospital visit interview 24h post natal**

Breast milk collection, child and mother saliva, socioeconomic and demographic data, food frequency questionnaire and gestational physical activity questionnaire.

### **Home visit interview at 7 days of life**

Child health conditions questionnaire, mother 24h food-recall, Neurologic Adaptative Capacity Score (NACS), What Being the Parent of a New Baby Is Like questionnaire (WPL) and maternal and child anthropometry.

### **Home visit interview at 15 days of life**

Child health conditions questionnaire, mother and child 24h food-recall, What Being the Parent of a New Baby Is Like (WPL), The Perceived Maternal Parenting Self-Efficacy (PMP S-E), Karitane Parenting Confidence Scale (KPCS) questionnaires, gestational violence questionnaire and maternal and child anthropometry.

### **CRC visit interview at 1 month old**

Child health conditions questionnaire, mother and child 24h food-recall, Edinburgh Postnatal Depression questionnaire (EPDS), sleep questionnaire, Perceived Stress Scale (PSS-14), child imitational abilities evaluation and maternal and child anthropometry.

### **Home visit interview at 3 month old**

Child health conditions questionnaire, mother and child 24h food-recall, Edinburgh Postnatal Depression questionnaire (EPDS), sleep questionnaire, Parental Bonding Instrument (PBI), Alberta Infant Motor Scale (AIMS), Postpartum Bonding Instrument (PBQ) and maternal and child anthropometry.

### **CRC visit interview at 6 month old**

Child health conditions questionnaire, mother and child 24h food-recall, Edinburgh Postnatal Depression questionnaire (EPDS), sleep questionnaire, Infant Behavior Questionnaire-Revised (IBQ-R), Affordance in the Home Environment Motor Development Infant Scale (AHEMD-IS), Alberta Infant Motor Scale (AIMS), Postpartum Bonding Instrument (PBQ), Parent-Child Early Relational Assessment (PCERA), postnatal violence questionnaire and maternal and child anthropometry.
